# Supplementary material for: MDG625: A daily high-resolution meteorological dataset derived by geopotential-guided attention network in Asia (1940–2023)
Source: Copernicus journal article supplement (doi:10.5194/essd-2024-137), 2024-06-24
Supplement: Supplementary file [file essd-2024-137-AC2-supplement.pdf]

## Author Reply to RC2 of esd-2024-137

We sincerely appreciate the time and effort Referee #2 has dedicated to reviewing our work and providing valuable feedback. It is a great honor to receive such insightful comments, which have helped us improve and refine our manuscript. We are truly grateful for your patience and thoughtful guidance. May our replies answer the questions raised in your comment. Below, we offer detailed responses to the queries and suggestions raised.

### General comments:

The study downscaled a 6 km<sup>2</sup> daily meteorological dataset based on a geopotential-guided attention network (GeoAN) in Asia, covering the period from 1940 to 2023. The dataset is likely to be valuable for a wide range of applications, including climate change studies and extreme weather events analysis. However, the precision and validation of the downscaled dataset require more comprehensive evaluation. Additionally, the methodology could benefit from more detailed comparisons with alternative approaches to further highlight its advantages. The English presentation of the also requires significant improvement.

### General responses:

We appreciate for reviewing our work and giving your valuable suggestions. We mainly compared our results with CLDAS, a high-quality land assimilation dataset in Asia. Since it's hard to obtain grid true value to compare in a long historical term, we will seek more cooperation for validation and using a large range of data, including remote sensing, gauged value, and so on, in the future. As to the reasons for outperformance, we try to explain more comprehensively why GeoAN performs better by analyzing each method's visual results and how the deep learning methods restore the fine details from the coarse input. The model could learn geographic world information by using geopotential from the distribution of the training dataset. For more information can refer to **A4** below. Lastly, we carefully revised the manuscript and polished the English presentation following the native speakers' suggestions.

**Q1:** The English presentation in the manuscript should be much more formal and precise.

- Line 29: Replace 'kind of research' with a more formal term.
- Line 31: 'kinetic downscaling' should be corrected.
- Line 125: The phrase 'in this paper for the downscaling task, and SwinIR can be found in' should be corrected.
- Line 135: The phrase 'this phenomenon may caused by the that' contains a grammatical error, 'the' should be removed.
- Line 76: why mentioned 'For the TP (mm), the day sum is adopted' again after line 70 ? consider removing line 76.

**A1:** Thank you so much for pointing out our inappropriate paper writing, we will carefully address the grammatical issues and further refine the manuscript. Below are our detailed responses to the points mentioned.

**Point 1:** We used "various studies" to replace the original "kinds of research":

*Lines 32 in the revised version:*

*"High-quality and high-resolution data is necessary for various studies, to solve the contradiction."*

**Point 2:** The incorrect usage of “kinetic downscaling” in the whole manuscript has been corrected to “dynamical downscaling” in *lines 36, 41, and 43* of the revised manuscript.

**Point 3:** The Original phrase was refined as follows:

*Lines 148-156 in the revised version:*

*“This section details experiments to evaluate the performance of GeoAN. For comparison, the classic algorithm bilinear interpolation, widely used in downscaling, is included. Additionally, two deep learning methods, U-Net (Ronneberger et al., 2015) and SwinIR (Liang et al., 2021), were employed for comparative analysis. The source code for both networks was obtained from their perspective GitHub repositories. To ensure a fair comparison, the U-Net architecture was modified for the downscaling task, resulting in a customized version referred to as U-Net Evolution (U-Net Evol.). The original U-Net implementation is available at <https://github.com/milesial/Pytorch-UNet>, while the SwinIR code can be accessed at <https://github.com/JingyunLiang/SwinIR>. To maintain consistency, all deep learning models were configured with equivalent parameters or computational complexity, and they were trained for 100 epochs using identical hyperparameters under the same environmental conditions.”*

**Point 4:** The redundant “the” has been removed from the phrase:

*Lines 163 in the revised version:*

*“...this phenomenon may caused by that...”*

**Point 5:** We mentioned the values of PRS, T2m, and WS10m are calculated from the mean results. Corresponding to the above information, we explain that TP is the total precipitation sum up in one whole day again. It seems that the content is indeed repeated and we refine the text as follows:

*Lines 101-103 in the revised version:*

*“The temporal resolution of these two datasets is calculated to one day, which is calculated by the mean of PRS (hPa), T2m (K), WS10m (m2/s) and the sum of TP (mm) over the whole day respectively using the original hourly data.”*

**Q2:** The introduction requires more comprehensive structured and detailed descriptions.

- Lines 24–27 and 44-47: While these lines list several studies, the authors should provide more detailed information about each study and explain their relevance to this research.
- The author should clearly outline the research gaps and demonstrate the unique advantages of their methodology.

**A2:** We sincerely appreciate your constructive and insightful suggestions for improving the manuscript. We have added an introduction to the related work part in the paper and provided a detailed discussion on the development of downscaling. Below, we outline our revisions along with the corresponding new line numbers for your reference regarding the work suggested.

**Point 1:**

*Lines 23-30 in the revised version:*

*“He et al. (2020) produced a meteorological dataset with a spatial resolution of  $0.1^\circ$  from 1979 in China. In this paper, the China Meteorological Forcing Dataset was proposed by fusing remote sensing products, reanalysis datasets, and in-situ station data. The most significant contribution of this work was using a larger number of stations to raise the quality of the dataset. A long-term gridded daily meteorological dataset for northwestern North America was proposed by Werner et al. (2019). The authors try to produce a dataset for training statistical downscaling schemes in Canada. The same in Italian, Bonanno et al. (2019) proposed the high-resolution meteorological*

dataset named MERIDA. MERIDA was produced by dynamical downscaling from the fifth-generation reanalysis dataset for the global climate and weather (ERA5) using WRF.”

**Lines 57-71 in the revised version:**

“Shen et al. (2023) proposed a near-surface air temperature downscaling network SNCA-CLDASSD. In this model, Shen, et al. used two attention blocks to downscale the input data called Cross-Attention based on Light-CLDASSD. However, only near-surface air temperature is considered in this work and the network was built on CLDAS, which cannot cover long-term years. Liu et al. (2023) used the terrain to guide the deep learning network for the downscaling task called terrain-guided attention network (TGAN) in Southwest China. TGAN used the digital elevation model (DEM) to build high-resolution temperature (at 2 meters) results. The range of TGAN used begins in 2018 and TGAN cannot be used in the historical situation. Zhong et al. (2023) proposed a transformer-based learning method Uformer, which directly adds topography data, to achieve high-resolution meteorological variables in inner Mongolia province, China. Although topography data can help rebuild the high-resolution, directly adding into the input low-resolution will lose the characters of topography. All of the above, existing advanced deep learning methods of meteorological downscaling mostly used attention architecture (Transformer is one of the special attention architectures). However, now existing methods focus on one or two meteorological variables, while different variables have correlations and deep learning could handle multiple variables simultaneously. This way, not only saves the computational resources but also improves the performance of the model. Last and most important, there are no models that can cover a long-term and wide range of historical multiple variables.”

**Point 2:** We appreciate the insightful review and it truly helps us improve the expression and can explain the research characteristics clearly. The appended discussion above for providing more outline information is added in the introduction section of the revised manuscript shown as follows:

**Lines 72-82 in the revised version:**

“In this paper, we propose a new attention-based network called the Geopotential-guided Attention Network (GeoAN), the structure of which is shown in Fig. 1 for downscaling meteorological variables, including temperature at 2m (T2m), pressure at the surface (PRS), and wind speed at 10m (WS10m) from 0.25° to 0.0625°. The proposed GeoAN is guided by the geopotential, which makes the model learn information directly instead of spontaneously... The data quality and resolution of CLDAS are relatively high, but data is only available for China and the surrounding areas and for the years after 2008. After utilizing deep learning networks to construct the mapping relationship between ERA5 and CLDAS, a historical meteorological dataset since 1940 was produced. Our produced MDG625 makes up for the lack of the CLDAS before 2008 and increases the spatial resolution of ERA5.”

**Q3:** For the methodology, the study only used daily data from 2020–2022 for training and daily data from 2023 for validation, to downscale 60 years of data since 1940. This raises concerns about whether the training and validation dataset is sufficient to ensure the accuracy of the downscaled dataset. I suggest:

- Use a larger training and validation dataset to improve reliability.
- Consider the leave-one-out cross-validation method to enlarge the training dataset.

**A3:** Thank you so much for the insightful suggestions. Using more data is absolutely a good way to increase the performance. In the future, we will try to use a wider year range for training models. However, here are some considerations about how many years we should use suitable for this work we have consideration.

**Point 1:**

1) The data is used to train the model for building the relationship between CLDAS and ERA5, when the training step is finished, the relation between low and high resolution is fixed. The performance is only affected by how well the model learns, no matter how many years MDG625 contains. Using more data needs a larger model to adapt, and the small model makes it hard to learn so much information from a huge dataset. However, training a large model is a big challenge for both hardware and time costs. Another reason we use these years is also considered, the huge performance raised by the increasing data size usually needs the increasing order of magnitude of the data, and for a slight performance increase, a huge cost is not efficient. We will produce MDG625 V2 with a stronger and larger model using a larger dataset in the future, including reanalysis datasets, remote sensing, and other data sources.

**Table AC2-1.** The data range of different deep learning downscaling methods is used.

|                     | Training dataset              | Testing dataset   |
|---------------------|-------------------------------|-------------------|
| Zhong et al. (2023) | 2020.01 – 2021.05             | 2021.06 – 2021.09 |
| Liu et al. (2023)   | 2019.01 – 2019.12             | 2018              |
| Shen et al. (2023)  | 90% of 2016, 2017, 2019, 2020 | 2018              |

2) Due to many researchers (Zhong et al. (2023); Liu et al. (2023); Shen et al. (2023)), as shown in Tab. AC2-1, only using the data in one or two years for downscaling one or two meteorological parameters, we finally decided to use 3 years for training. The total size stored in ‘numpy format (.npy)’ is up to around 40G (30G for training+10G for testing). Considering the size of the high-resolution data (1040×1600) is big when comparing other deep learning methods, the number of training datasets is reasonable.

3) The validation dataset needs to cover one full cycle, for the meteorological task is one year. Although there are slight distributing differences between different years, using a whole year of data for validation is enough to cover most situations.

**Point 2:** The cross-validation method is known for its efficient use of data and reducing overfitting. When addressing the one-shot task, it is a powerful technique to adopt. However, the cross-validation method is not a common method in deep learning since there are other skills to avoiding overfitting like regularization or dropout. We followed the most experiment designs and skills in the super-resolution (SR) and that is why there is no cross-validation in this work. On the one hand, there are enough data and training epochs to learn the relationship. On the other hand, the progress of training a model is complex, and for a better result, most researchers usually use lots of skills and pre-trained models to accelerate model convergence, and it is hard to make progress in cross-validation in deep learning work. We used the pre-trained models from the former experiments too as shown in Fig. AC2-1. As shown in the figure, our proposed model’s convergence is satisfactory after 100 training epochs and learns well from the dataset.

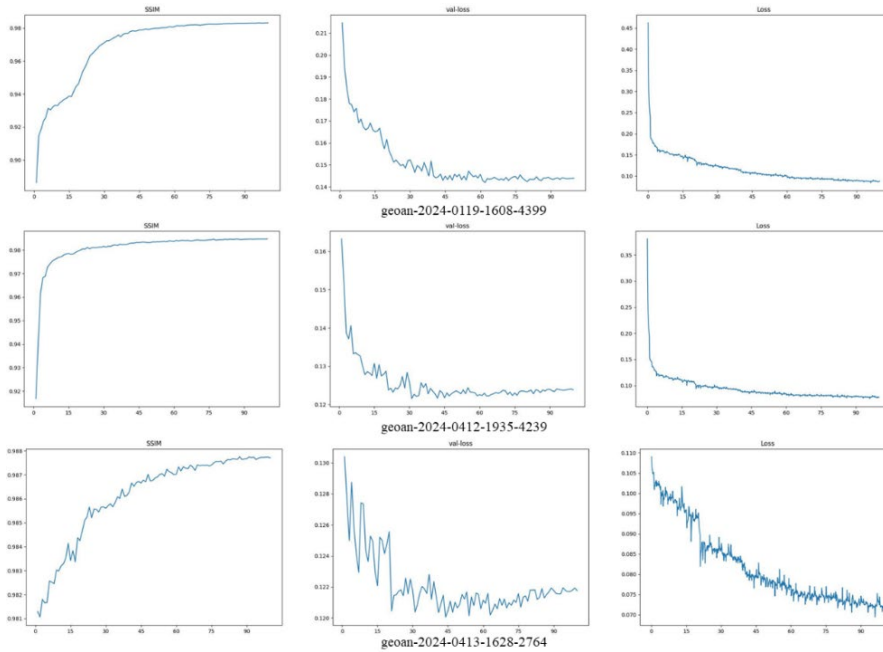

**Figure AC2-1.** The original training logs of GeoAN. The final GeoAN is trained from the pre-trained model: geoan-2024-0412-1935-4239 (recorded as version-4239), and the version-4239 is trained from version-4399.

**Q4:** For results,

- Quantitative results (e.g.,  $R^2$ , PSNR) demonstrate the effectiveness of GeoAN, but the discussion of why GeoAN outperforms other methods could be expanded.
- The visual comparisons (Fig.3-5) look impressive; however, it would be useful to provide more quantitative evidence to support claims about GeoAN's ability to restore fine details.

**A4:** Thanks a lot for the suggestions. Deep learning is criticized for its unexplained ability, but also achieves great results (Chakraborty et al., 2017). It's a big challenge for us to explain why GeoAN, a deep learning method, performs at a mechanistic level. However, we still try to explain how GeoAN outperforms others.

**Point 1: Discussion on why GeoAN performs better than other methods**

It is hard to say which skill contributes most to the performance because the explanation is lacking in deep learning. Analyzing the experiment's progress, the biggest difference of GeoAN is the geopotential-guided attention block (GeoAB) we proposed in this work. The geopotential can reflect many geographic information and it helps the model understand the world well. In other words, the model can know such as elevation directly without learning. Elevation is closely related to the meteorological variables definitely and GeoAB can guide the model to learn the information associated with the variables directly. In other compared methods, there is no geopotential to guide producing progress, and these methods need to learn the elevation relationship spontaneously. It's more like an engineering problem to get the best result and produce the historical dataset.

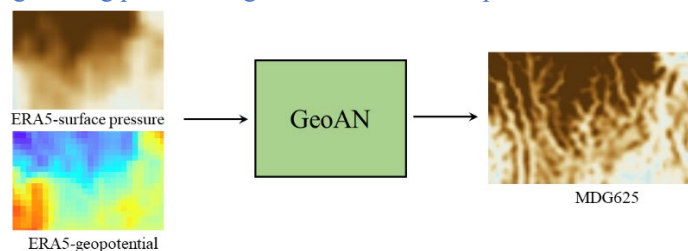



**Figure AC2-2.** GeoAN can restore the details that are not included in the input data.

**Point 2: Discussion on why PSR is superior to other variables and how GeoAN restores fine details**

We discuss this part in Appendix B in the revised version, and here is the content of the discussion:

*Lines 251-261 in the revised version:*

*“The PSNR of GeoAN on PRS is up to 47.251dB on the testing dataset. The leading performance compared with other methods of PSR is larger than other variables, and we find the PRS’s outperformance of GeoAN in mountainous areas extremely obvious. GeoAN can produce the details that are not included in the input data as shown in Fig. 3. Considering the original input data ERA5 lacks the details as shown in Fig. AC2-2, it is reasonable to infer that deep learning methods can learn detailed information from the distribution of the ground truth in the training step. The less change in the variables, the better the results will be. The training step provides enough information on the detailed shape and the low-resolution input ERA5 of each test offers the value of each grid. This is the most important reason why GeoAN can produce fine details. We also found the change in pressure is much lower than other variables, and we infer that’s why the metrics of pressure perform better than others. The change of temperature in one year is bigger than the pressure as shown in Fig. AC2-3 and AC2-4, and the PSNR of T2m is worse than PRS. Therefore, the performance of WS10m is worst can be inferred from the drastic irregular changes, because there is not enough information for the models to restore the details of WS10m in the training dataset.”*

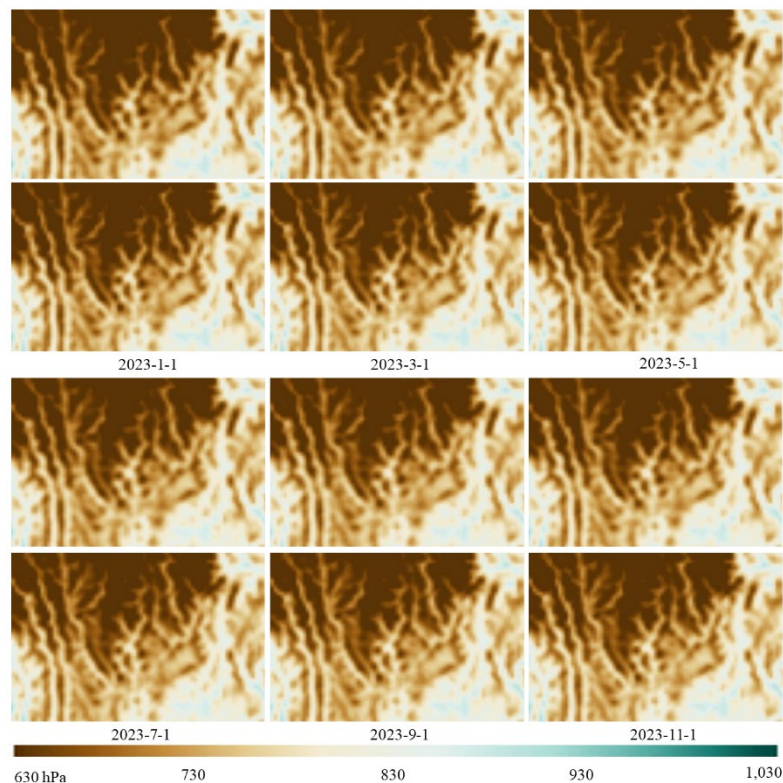

**Figure AC2-3.** The PRS details of GeoAN (above one) and Ground Truth (below one). There are 6 days listed in the figure distributed in 2023. The complete information on the area can be found in the paper’s Fig. 3. The change in PRS is very small in one year, and each result of these 6 days is similar.

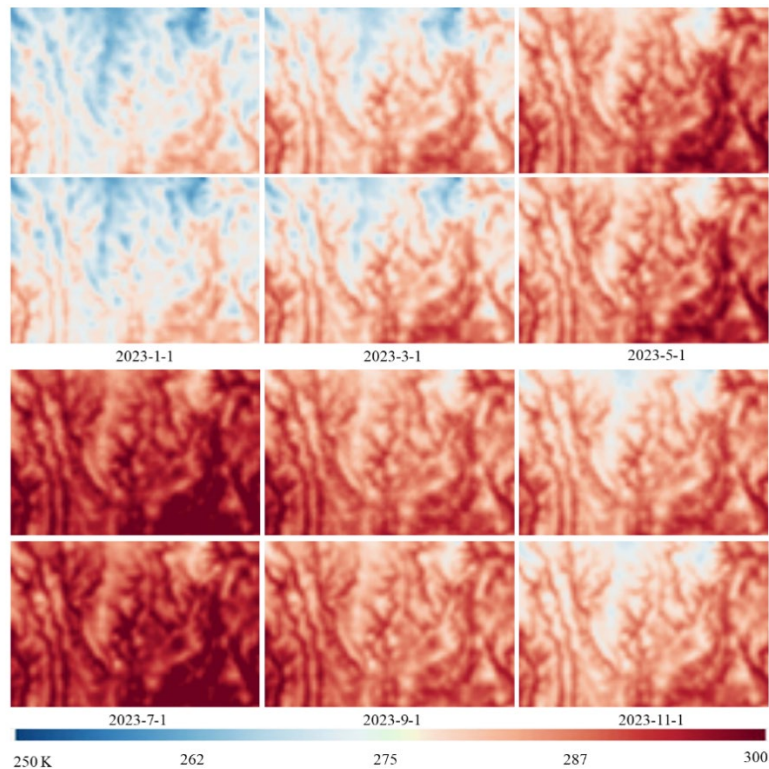

**Figure AC2-4.** The T2m details of GeoAN (above one) and Ground Truth (below one) in the same area of PRS in Fig. AC2-3. Compared with the change in one year of PRS, the change in T2m is larger.

**Q5:** The decision not to include precipitation data is understandable but significantly limits the dataset’s utility for hydrological modeling applications. Future plans to address this gap would be valuable.

**A5:** We agree with this suggestion very much, we are concerned about the precipitation since its importance. Here are some future plans we considered in future.

1) We are going to try more sources of data for precipitation not only the reanalysis production, but especially remote sensing, radar, and gauged stations.

2) The merging geographic mechanism in the deep learning model is the most promising solution to downscale higher-resolution precipitation. In the future, this will be our main research direction.

3) Precipitation is not closely related to geopotential; we will further find other geographic elements to guide the deep learning method to downscale the precipitation.

4) The forecasting of precipitation is valuable, and we will try to produce a forecasting system that not only produces the historical dataset.

The above discussion can be found in the revised manuscript:

***Lines 230-232 in the revised version:***

*“In future work, we will try to merge remote sensing and gauged precipitation to downscale the precipitation using other geographic principles and using more suitable variables instead of geopotential.”*

**Q6:** The Discussion section should give more information about:

- Comparison of the methodology with other downscaling methods or downscaled datasets.

The advantages and limitations of the proposed methodology should be explicitly described.

- The author could consider referencing recent methodologies, such as ‘Multiplepoint geostatistics-based spatial downscaling of heavy rainfall fields’ (Doi:10.1016/j.jhydrol.2024.130899), to provide a broader context for their work.

**A6:** Your suggestion is insightful for us to improve this work. As to the questions in the discussion, here are our replies:

**Point 1:** As far as we are known, our work is the first attempt to establish the mapping relationship from ERA5 to CLDAS to make a long-term daily meteorological dataset. Thus, there are no existing works that can be compared directly. Downscaling is a similar task to super-resolution in computer vision, so we choose three super-resolution methods migrating to this task to make a comparison:

- 1) Bilinear is the most classic and commonly used algorithm to improve resolution.
- 2) U-net has been one of the most used deep learning methods in recent years in various tasks for its strong universality.
- 3) SwinIR, proposed in 2021, was a novel SOTA (state-of-the-art) super-resolution model based on a transformer block. It can be considered the benchmark and representative deep learning method of SR-related missions.

To migrate the methods to downscale the long-term meteorological dataset from ERA5 to CLDAS, each existing method has to be redesigned. These methods may take several weeks to months to retrain to be compatible with the task. In the future, we will continue to make larger comparisons with more existing representative deep learning methods and delve into how these deep learning methods can dig geographic information to help downscale the variables.

**Point2:** The advantages and limitations have been appended in the paper:

***Lines 210-216 in the revised version:***

*“However, GeoAN achieved a great result and MDG625 is valuable for a wide range of applications, there are some limitations in this work. Limited by the computational expenses and the memory of GPU, we cannot use a larger model to train with more datasets. A larger model and more training datasets could help the performance a lot. The MDG625 produced the area in Asia, however, if the fixed position information was masked and more datasets to cover the other areas in the training step, the global results could be produced. A global high-resolution historical dataset can be very valuable. In addition, by our proposed GeoAN, hourly variables also can be produced, but only daily data are provided in MDG625 since the hard disk capacity is not enough for such a large amount of data.”*

***Lines 223-230 in the revised version:***

*“Considering the rarity of long-term historical high-resolution meteorological data in Asia, MDG625 (Meteorological Dataset with 0.0625° resolution produced by a Geopotential-guide attention network) provided a solution using a deep geographic coupling attention network called the geopotential-guide attention network (GeoAN) within an acceptable error. GeoAN could learn the geopotential relationship directly, which is closely related to meteorological variables. This Strategy could help the network understand the geographic world more easily and produce a better result. MDG625 contains daily temperature at 2m, surface pressure, and 10m wind speed since 1940. Experimental results demonstrated the superior performance of the GeoAN and the satisfaction of MDG625. Our proposed MDG625 could make up for the*



*lack of a long historical meteorological high-resolution dataset. For various meteorological researches is valuable.”*

**Point3:** After reading the recommended paper, it contains more discussion on precipitation downscaling.

This part will be discussed and the recent work will be referred to in the revised manuscript:

*Lines 216-221 in the revised version:*

*“Lastly, precipitation poses a challenge for statistical models, particularly in extreme cases (Zou et al., 2024; Sachindra et al., 2018; Xu et al., 2015). The dataset referenced in MDG625 includes three meteorological variables (PRS, T2M, and WS10m), but it lacks precipitation data. The low correlation of total precipitation (TP) between the ERA5 and CLDAS datasets is the primary reason why the GeoAN model struggles to accurately restore the spatial structure of precipitation. Inspired by the work of (Zou et al., 2024), more comprehensible algorithms could be implemented in GeoAN in the future.”*

## References:

Bonanno, R., Lacavalla, M., and Sperati, S.: A new high-resolution meteorological reanalysis Italian dataset: MERIDA, Quarterly Journal of the Royal Meteorological Society, 145, 1756–1779, 2019.

Chakraborty, S., Tomsett, R., Raghavendra, R., Harborne, D., Alzantot, M., Cerutti, F., Srivastava, M., Preece, A., Julier, S., Rao, R. M., et al.: 260 Interpretability of deep learning models: A survey of results, in: 2017 IEEE smartworld, ubiquitous intelligence & computing, advanced & trusted computed, scalable computing & communications, cloud & big data computing, Internet of people and smart city innovation (smartworld/SCALCOM/UIC/ATC/CBDcom/IOP/SCI), pp. 1–6, IEEE, 2017.

He, J., Yang, K., Tang, W., Lu, H., Qin, J., Chen, Y., and Li, X.: The first high-resolution meteorological forcing dataset for land process studies over China, Scientific data, 7, 25, 2020.

Liu, G., Zhang, R., Hang, R., Ge, L., Shi, C., and Liu, Q.: Statistical downscaling of temperature distributions in southwest China by using terrain-guided attention network, IEEE Journal of Selected Topics in Applied Earth Observations and Remote Sensing, 16, 1678–1690, 2023.

Sachindra, D., Ahmed, K., Rashid, M. M., Shahid, S., and Perera, B.: Statistical downscaling of precipitation using machine learning techniques, Atmospheric research, 212, 240–258, 2018.

Shen, Z., Shi, C., Shen, R., Tie, R., and Ge, L.: Spatial Downscaling of Near-Surface Air Temperature Based on Deep Learning Cross-Attention Mechanism, Remote Sensing, 15, 5084, 2023.

Shi, C., Xie, Z., Qian, H., Liang, M., and Yang, X.: China land soil moisture EnKF data assimilation based on satellite remote sensing data, Science China Earth Sciences, 54, 1430–1440, 2011.

Shi, C., Jiang, L., Zhang, T., Xu, B., and Han, S.: Status and plans of CMA land data assimilation system (CLDAS) project, in: EGU General Assembly Conference Abstracts, p. 5671, 2014.

Sun, S., Shi, C., Pan, Y., Bai, L., Xu, B., Zhang, T., Han, S., and Jiang, L.: Applicability assessment of the 1998–2018 CLDAS multi-source precipitation fusion dataset over China, *Journal of Meteorological Research*, 34, 879–892, 2020.

Werner, A., Schnorbus, M., Shrestha, R., Cannon, A., Zwiers, F., Dayon, G., and Anslow, F.: A long-term, temporally consistent, gridded daily meteorological dataset for northwestern North America, *Scientific Data*, 6, 1–16, 2019.

Xu, S., Wu, C., Wang, L., Gonsamo, A., Shen, Y., and Niu, Z.: A new satellite-based monthly precipitation downscaling algorithm with non-stationary relationship between precipitation and land surface characteristics, *Remote sensing of environment*, 162, 119–140, 2015.

Zhong, X., Du, F., Chen, L., Wang, Z., and Li, H.: Investigating transformer-based models for spatial downscaling and correcting biases of near-surface temperature and wind-speed forecasts, *Quarterly Journal of the Royal Meteorological Society*, 2023.
